# Supplementary material for: Clinical Significance of PTEN Deletion, Mutation, and Loss of PTEN Expression in De Novo Diffuse Large B-Cell Lymphoma
Source: PubMed Central journal article supplement — Neoplasia. 2018 May 4;20(6):574–93. doi: 10.1016/j.neo.2018.03.002 (PMC5994742; doi:10.1016/j.neo.2018.03.002), 2018-05-04
Supplement: mmc1.pdf [file mmc1.pdf]

Supplementary Tables

**Supplementary Table S1.** Comparison of clinicopathologic features of patients with diffuse large B-cell lymphoma (DLBCL) with and without PTEN nuclear expression in the training cohort

|                                    | in DLBCL                  |                           | <i>P</i>          | in GCB-DLBCL              |                           | <i>P</i>          | in ABC-DLBCL              |                           | <i>P</i>          | in AKT <sup>high</sup> DLBCL |                           | <i>P</i>      | in AKT <sup>high</sup> ABC |                           | <i>P</i>     |
|------------------------------------|---------------------------|---------------------------|-------------------|---------------------------|---------------------------|-------------------|---------------------------|---------------------------|-------------------|------------------------------|---------------------------|---------------|----------------------------|---------------------------|--------------|
|                                    | Nuclear PTEN <sup>+</sup> | Nuclear PTEN <sup>-</sup> |                   | Nuclear PTEN <sup>+</sup> | Nuclear PTEN <sup>-</sup> |                   | Nuclear PTEN <sup>+</sup> | Nuclear PTEN <sup>-</sup> |                   | Nuclear PTEN <sup>+</sup>    | Nuclear PTEN <sup>-</sup> |               | Nuclear PTEN <sup>+</sup>  | Nuclear PTEN <sup>-</sup> |              |
|                                    | n=280                     | n=198                     |                   | n=136                     | n=102                     |                   | n=140                     | n=94                      |                   | n=69                         | n=38                      |               | n=36                       | n=18                      |              |
| <b>GCB/ABC Subtype</b>             |                           |                           |                   |                           |                           |                   |                           |                           |                   |                              |                           |               |                            |                           |              |
| GCB                                | 136                       | 102                       | 0.58              |                           |                           |                   |                           |                           |                   | 33                           | 20                        | 0.69          |                            |                           |              |
| ABC                                | 140                       | 94                        |                   |                           |                           |                   |                           |                           |                   | 36                           | 18                        |               |                            |                           |              |
| <b>Age, years</b>                  |                           |                           |                   |                           |                           |                   |                           |                           |                   |                              |                           |               |                            |                           |              |
| < 60                               | 114                       | 90                        | 0.3               | 66                        | 56                        | 0.36              | 45                        | 32                        | 0.78              | 32                           | 21                        | 0.42          | 12                         | 9                         | 0.26         |
| ≥ 60                               | 166                       | 108                       |                   | 70                        | 46                        |                   | 95                        | 62                        |                   | 37                           | 17                        |               | 24                         | 9                         |              |
| <b>Sex</b>                         |                           |                           |                   |                           |                           |                   |                           |                           |                   |                              |                           |               |                            |                           |              |
| Male                               | 174                       | 108                       | 0.11              | 84                        | 57                        | 0.42              | 88                        | 51                        | 0.22              | 45                           | 19                        | 0.15          | 21                         | 9                         | 0.58         |
| Female                             | 106                       | 90                        |                   | 52                        | 45                        |                   | 52                        | 43                        |                   | 24                           | 19                        |               | 15                         | 9                         |              |
| <b>Stage</b>                       |                           |                           |                   |                           |                           |                   |                           |                           |                   |                              |                           |               |                            |                           |              |
| I - II                             | 130                       | 89                        | 0.78              | 77                        | 51                        | 0.5               | 51                        | 36                        | 1                 | 29                           | 15                        | 0.84          | 12                         | 8                         | 0.56         |
| III-IV                             | 141                       | 103                       |                   | 56                        | 46                        |                   | 83                        | 57                        |                   | 37                           | 21                        |               | 22                         | 10                        |              |
| <b>B-symptoms</b>                  |                           |                           |                   |                           |                           |                   |                           |                           |                   |                              |                           |               |                            |                           |              |
| No                                 | 177                       | 116                       | 0.49              | 100                       | 56                        | <b>0.019</b>      | 74                        | 58                        | 0.27              | 45                           | 21                        | 0.52          | 17                         | 9                         | 1            |
| Yes                                | 91                        | 69                        |                   | 32                        | 36                        |                   | 58                        | 33                        |                   | 22                           | 14                        |               | 17                         | 9                         |              |
| <b>LDH</b>                         |                           |                           |                   |                           |                           |                   |                           |                           |                   |                              |                           |               |                            |                           |              |
| Normal                             | 110                       | 50                        | <b>&lt;0.0001</b> | 58                        | 25                        | <b>0.003</b>      | 51                        | 25                        | <b>0.045</b>      | 28                           | 6                         | <b>0.002</b>  | 15                         | 3                         | <b>0.06</b>  |
| Elevated                           | 143                       | 136                       |                   | 66                        | 68                        |                   | 74                        | 66                        |                   | 31                           | 31                        |               | 16                         | 14                        |              |
| <b>Extranodal sites</b>            |                           |                           |                   |                           |                           |                   |                           |                           |                   |                              |                           |               |                            |                           |              |
| 0 - 1                              | 213                       | 140                       | 0.31              | 110                       | 71                        | 0.18              | 100                       | 68                        | 1                 | 52                           | 20                        | <b>0.036</b>  | 24                         | 10                        | 0.53         |
| ≥ 2                                | 58                        | 48                        |                   | 22                        | 23                        |                   | 35                        | 24                        |                   | 14                           | 15                        |               | 10                         | 7                         |              |
| <b>ECOG score</b>                  |                           |                           |                   |                           |                           |                   |                           |                           |                   |                              |                           |               |                            |                           |              |
| 0 - 1                              | 211                       | 143                       | 0.43              | 105                       | 71                        | 0.23              | 102                       | 70                        | 1                 | 53                           | 22                        | <b>0.03</b>   | 28                         | 10                        | 0.14         |
| ≥ 2                                | 39                        | 33                        |                   | 14                        | 16                        |                   | 25                        | 17                        |                   | 8                            | 11                        |               | 5                          | 6                         |              |
| <b>Tumor size</b>                  |                           |                           |                   |                           |                           |                   |                           |                           |                   |                              |                           |               |                            |                           |              |
| < 5 cm                             | 127                       | 75                        | 0.66              | 64                        | 38                        | 0.88              | 61                        | 36                        | 0.75              | 31                           | 6                         | <b>0.053</b>  | 19                         | 3                         | 0.11         |
| ≥ 5 cm                             | 88                        | 58                        |                   | 44                        | 28                        |                   | 44                        | 30                        |                   | 19                           | 12                        |               | 8                          | 6                         |              |
| <b>IPI score</b>                   |                           |                           |                   |                           |                           |                   |                           |                           |                   |                              |                           |               |                            |                           |              |
| 0 - 2                              | 172                       | 111                       | 0.44              | 96                        | 60                        | 0.25              | 72                        | 49                        | 1                 | 42                           | 15                        | <b>0.04</b>   | 17                         | 8                         | 0.78         |
| > 2                                | 102                       | 77                        |                   | 38                        | 34                        |                   | 64                        | 43                        |                   | 25                           | 22                        |               | 17                         | 10                        |              |
| <b>Therapy response</b>            |                           |                           |                   |                           |                           |                   |                           |                           |                   |                              |                           |               |                            |                           |              |
| CR                                 | 214                       | 143                       | 0.34              | 106                       | 71                        | 0.18              | 104                       | 70                        | 1                 | 50                           | 26                        | 0.66          | 26                         | 14                        | 0.75         |
| PR                                 | 32                        | 32                        |                   | 10                        | 18                        |                   | 22                        | 14                        |                   | 10                           | 7                         |               | 8                          | 2                         |              |
| SD                                 | 8                         | 14                        |                   | 5                         | 8                         |                   | 3                         | 6                         |                   | 4                            | 3                         |               | 1                          | 2                         |              |
| PD                                 | 26                        | 9                         |                   | 15                        | 5                         |                   | 11                        | 4                         |                   | 5                            | 2                         |               | 1                          | 0                         |              |
| <b>Cytoplasmic PTEN expression</b> |                           |                           |                   |                           |                           |                   |                           |                           |                   |                              |                           |               |                            |                           |              |
| Negative                           | 43                        | 129                       | <b>&lt;0.0001</b> | 29                        | 72                        | <b>&lt;0.0001</b> | 14                        | 55                        | <b>&lt;0.0001</b> | 5                            | 13                        | <b>0.0004</b> | 2                          | 4                         | 0.066        |
| Positive                           | 237                       | 69                        |                   | 107                       | 30                        |                   | 126                       | 39                        |                   | 64                           | 25                        |               | 34                         | 14                        |              |
| <b>TP53 mutations</b>              |                           |                           |                   |                           |                           |                   |                           |                           |                   |                              |                           |               |                            |                           |              |
| No                                 | 202                       | 127                       | 0.13              | 92                        | 65                        | 0.95              | 107                       | 60                        | <b>0.027</b>      | 53                           | 22                        | 0.42          | 30                         | 11                        | 0.54         |
| Yes                                | 50                        | 45                        |                   | 32                        | 23                        |                   | 18                        | 22                        |                   | 9                            | 6                         |               | 3                          | 2                         |              |
| <b>MDM2 expression</b>             |                           |                           |                   |                           |                           |                   |                           |                           |                   |                              |                           |               |                            |                           |              |
| ≤ 10%                              | 151                       | 137                       | <b>0.0007</b>     | 80                        | 74                        | <b>0.018</b>      | 70                        | 63                        | <b>0.014</b>      | 36                           | 27                        | 0.058         | 18                         | 12                        | 0.25         |
| > 10%                              | 122                       | 56                        |                   | 54                        | 25                        |                   | 68                        | 30                        |                   | 33                           | 11                        |               | 18                         | 6                         |              |
| <b>BCL6 expression</b>             |                           |                           |                   |                           |                           |                   |                           |                           |                   |                              |                           |               |                            |                           |              |
| ≤ 30%                              | 53                        | 56                        | <b>0.014</b>      | 11                        | 17                        | <b>0.044</b>      | 42                        | 39                        | <b>0.05</b>       | 8                            | 10                        | <b>0.04</b>   | 7                          | 8                         | <b>0.037</b> |
| > 30%                              | 219                       | 134                       |                   | 122                       | 82                        |                   | 97                        | 52                        |                   | 60                           | 26                        |               | 29                         | 9                         |              |
| <b>IgA IHC</b>                     |                           |                           |                   |                           |                           |                   |                           |                           |                   |                              |                           |               |                            |                           |              |
| 0%                                 | 277                       | 188                       | <b>0.01</b>       | 134                       | 96                        | 0.062             | 139                       | 90                        | 0.066             | 69                           | 37                        | 0.18          | 36                         | 18                        | 1            |
| 100%                               | 3                         | 10                        |                   | 2                         | 6                         |                   | 1                         | 4                         |                   | 0                            | 1                         |               | 0                          | 0                         |              |
| <b>IgG IHC</b>                     |                           |                           |                   |                           |                           |                   |                           |                           |                   |                              |                           |               |                            |                           |              |
| 0%                                 | 261                       | 167                       | <b>0.002</b>      | 127                       | 87                        | <b>0.04</b>       | 130                       | 78                        | <b>0.032</b>      | 66                           | 33                        | 0.1           | 34                         | 16                        | 0.46         |
| 100%                               | 19                        | 31                        |                   | 9                         | 15                        |                   | 10                        | 16                        |                   | 3                            | 5                         |               | 2                          | 2                         |              |
| <b>IgM IHC</b>                     |                           |                           |                   |                           |                           |                   |                           |                           |                   |                              |                           |               |                            |                           |              |

|       |     |     |      |     |    |      |    |    |      |    |    |      |    |    |      |
|-------|-----|-----|------|-----|----|------|----|----|------|----|----|------|----|----|------|
| < 10% | 205 | 138 | 0.41 | 117 | 86 | 0.71 | 84 | 50 | 0.35 | 49 | 29 | 0.65 | 19 | 12 | 0.33 |
| ≥ 10% | 75  | 60  |      | 19  | 16 |      | 56 | 44 |      | 20 | 9  |      | 17 | 6  |      |

**Abbreviations:** LDH, lactate dehydrogenase; ECOG, Eastern Cooperative Oncology Group; IPI, International Prognostic Index; CR, complete remission; PR, partial response; SD, stable disease; PD, progressive disease; GCB, germinal center B-cell-like; ABC, activated B-cell-like.

**Supplementary Table S2.** Comparison of clinicopathologic features of patients with diffuse large B-cell lymphoma (DLBCL) with and without *PTEN* deletion in the training cohort

|                           | in DLBCL                              |                                           | <i>P</i>      | in GCB-DLBCL                          |                                           | <i>P</i>     | in ABC-DLBCL                          |                                           | <i>P</i>     |
|---------------------------|---------------------------------------|-------------------------------------------|---------------|---------------------------------------|-------------------------------------------|--------------|---------------------------------------|-------------------------------------------|--------------|
|                           | <i>PTEN</i> deletion<br>n=44<br>N (%) | No <i>PTEN</i> deletion<br>n=315<br>N (%) |               | <i>PTEN</i> deletion<br>n=27<br>N (%) | No <i>PTEN</i> deletion<br>n=157<br>N (%) |              | <i>PTEN</i> deletion<br>n=17<br>N (%) | No <i>PTEN</i> deletion<br>n=157<br>N (%) |              |
| <b>Age, years</b>         |                                       |                                           |               |                                       |                                           |              |                                       |                                           |              |
| < 60                      | 20 (45.5)                             | 121 (38.4)                                | 0.41          | 11 (40.7)                             | 80 (51)                                   | 0.41         | 9 (52.9)                              | 40 (25.5)                                 | <b>0.024</b> |
| ≥ 60                      | 24 (54.5)                             | 194 (61.6)                                |               | 16 (59.3)                             | 77 (49)                                   |              | 8 (47.1)                              | 117 (74.5)                                |              |
| <b>Sex</b>                |                                       |                                           |               |                                       |                                           |              |                                       |                                           |              |
| Male                      | 25 (56.8)                             | 186 (59)                                  | 0.78          | 14 (51.9)                             | 89 (56.7)                                 | 0.68         | 11 (64.7)                             | 97 (61.8)                                 | 1            |
| Female                    | 19 (43.2)                             | 129 (41)                                  |               | 13 (48.1)                             | 68 (43.3)                                 |              | 6 (35.3)                              | 60 (38.2)                                 |              |
| <b>Stage</b>              |                                       |                                           |               |                                       |                                           |              |                                       |                                           |              |
| I - II                    | 19 (45.2)                             | 134 (44.2)                                | 0.90          | 14 (56)                               | 79 (52)                                   | 0.53         | 5 (29.4)                              | 55 (36.7)                                 | 0.61         |
| III-IV                    | 23 (54.8)                             | 169 (55.8)                                |               | 11 (44)                               | 73 (48)                                   |              | 12 (70.6)                             | 95 (63.3)                                 |              |
| <b>B-symptoms</b>         |                                       |                                           |               |                                       |                                           |              |                                       |                                           |              |
| No                        | 30 (73.2)                             | 196 (65.3)                                | 0.32          | 21 (84)                               | 101 (67.8)                                | 0.16         | 9 (56.3)                              | 94 (62.7)                                 | 0.6          |
| Yes                       | 11 (26.8)                             | 104 (34.7)                                |               | 4 (16)                                | 48 (32.2)                                 |              | 7 (43.8)                              | 56 (37.3)                                 |              |
| <b>LDH</b>                |                                       |                                           |               |                                       |                                           |              |                                       |                                           |              |
| Normal                    | 20 (52.6)                             | 120 (42.4)                                | 0.23          | 15 (65.2)                             | 64 (45.7)                                 | 0.11         | 5 (33.3)                              | 56 (39.4)                                 | 0.78         |
| Elevated                  | 18 (47.4)                             | 163 (57.6)                                |               | 8 (34.8)                              | 76 (54.3)                                 |              | 10 (66.7)                             | 86 (60.6)                                 |              |
| <b>Extranodal sites</b>   |                                       |                                           |               |                                       |                                           |              |                                       |                                           |              |
| 0 - 1                     | 34 (81)                               | 229 (76.8)                                | 0.55          | 21 (84)                               | 114 (77.6)                                | 0.6          | 13 (76.5)                             | 114 (76)                                  | 1            |
| ≥ 2                       | 8 (19)                                | 69 (23.2)                                 |               | 4 (16)                                | 33 (22.4)                                 |              | 4 (23.5)                              | 36 (24)                                   |              |
| <b>ECOG score</b>         |                                       |                                           |               |                                       |                                           |              |                                       |                                           |              |
| 0 - 1                     | 35 (92.1)                             | 226 (83.1)                                | 0.15          | 22 (95.7)                             | 107 (82.3)                                | 0.13         | 13 (86.7)                             | 118 (83.7)                                | 1            |
| ≥ 2                       | 3 (7.9)                               | 46 (16.9)                                 |               | 1 (4.3)                               | 23 (17.7)                                 |              | 2 (13.3)                              | 23 (16.3)                                 |              |
| <b>Tumor size</b>         |                                       |                                           |               |                                       |                                           |              |                                       |                                           |              |
| < 5 cm                    | 18 (48.6)                             | 158 (59.2)                                | 0.22          | 11 (52.4)                             | 81 (61.4)                                 | 0.48         | 7 (43.8)                              | 77 (57)                                   | 0.43         |
| ≥ 5 cm                    | 19 (51.4)                             | 109 (40.8)                                |               | 10 (47.6)                             | 51 (38.6)                                 |              | 9 (56.3)                              | 58 (43)                                   |              |
| <b>IPI score</b>          |                                       |                                           |               |                                       |                                           |              |                                       |                                           |              |
| 0 - 2                     | 30 (71.4)                             | 183 (60.4)                                | 0.17          | 19 (76)                               | 101 (66.9)                                | 0.49         | 11 (64.7)                             | 81 (53.6)                                 | 0.45         |
| > 2                       | 12 (28.6)                             | 120 (39.6)                                |               | 6 (24)                                | 50 (33.1)                                 |              | 6 (35.3)                              | 70 (46.4)                                 |              |
| <b>Therapy response</b>   |                                       |                                           |               |                                       |                                           |              |                                       |                                           |              |
| CR                        | 38 (86.4)                             | 234 (74.3)                                | 0.092         | 24 (88.9)                             | 116 (73.9)                                | 0.14         | 14 (82.4)                             | 117 (74.5)                                | 0.57         |
| PR                        | 3                                     | 44                                        |               | 1                                     | 19                                        |              | 2                                     | 25                                        |              |
| SD                        | 1                                     | 10                                        |               | 1                                     | 5                                         |              | 0                                     | 5                                         |              |
| PD                        | 2                                     | 27                                        |               | 1                                     | 17                                        |              | 1                                     | 10                                        |              |
| <b>GCB/ABC subtype</b>    |                                       |                                           |               |                                       |                                           |              |                                       |                                           |              |
| GCB                       | 27 (61.4)                             | 157 (50)                                  | 0.16          |                                       |                                           |              |                                       |                                           |              |
| ABC                       | 17 (38.6)                             | 157 (50)                                  |               |                                       |                                           |              |                                       |                                           |              |
| <b>MDM2 expression</b>    |                                       |                                           |               |                                       |                                           |              |                                       |                                           |              |
| ≤ 10%                     | 34 (77.3)                             | 173 (56)                                  | <b>0.0084</b> | 22 (81.5)                             | 90 (58.4)                                 | <b>0.023</b> | 12 (70.6)                             | 83 (53.5)                                 | 0.18         |
| > 10%                     | 10 (22.7)                             | 136 (44)                                  |               | 5 (18.5)                              | 64 (41.6)                                 |              | 5 (29.4)                              | 72 (46.5)                                 |              |
| <b>BCL6 expression</b>    |                                       |                                           |               |                                       |                                           |              |                                       |                                           |              |
| ≤ 30%                     | 4 (9.1)                               | 64 (20.5)                                 | 0.071         | 0 (0)                                 | 20 (12.9)                                 | <b>0.048</b> | 4 (23.5)                              | 44 (28)                                   | 0.69         |
| > 30%                     | 40 (90.9)                             | 248 (79.5)                                |               | 27 (100)                              | 135 (87.1)                                |              | 13 (76.5)                             | 113 (72)                                  |              |
| <b>BLIMP-1 expression</b> |                                       |                                           |               |                                       |                                           |              |                                       |                                           |              |
| < 10%                     | 38 (88.4)                             | 213 (70.8)                                | <b>0.016</b>  | 25 (92.6)                             | 118 (79.2)                                | 0.1          | 13 (81.3)                             | 95 (62.5)                                 | 0.14         |
| ≥ 10%                     | 5 (11.6)                              | 88 (29.2)                                 |               | 2 (7.4)                               | 31 (20.8)                                 |              | 3 (18.7)                              | 57 (37.5)                                 |              |

**Abbreviations:** LDH, lactate dehydrogenase; ECOG, Eastern Cooperative Oncology Group; IPI, International Prognostic Index; CR, complete remission; PR, partial response; SD, stable disease; PD, progressive disease; GCB, germinal center B-cell-like; ABC, activated B-cell-like.

**Supplementary Table S3.** Comparison of clinicopathologic features of patients with diffuse large B-cell lymphoma (DLBCL) with and without *PTEN* mutation in the training cohort

|                            | in DLBCL         |                 |               | in GCB-DLBCL     |                 |                   | in ABC-DLBCL     |                 |              |
|----------------------------|------------------|-----------------|---------------|------------------|-----------------|-------------------|------------------|-----------------|--------------|
|                            | MUT- <i>PTEN</i> | WT- <i>PTEN</i> | <i>P</i>      | MUT- <i>PTEN</i> | WT- <i>PTEN</i> | <i>P</i>          | MUT- <i>PTEN</i> | WT- <i>PTEN</i> | <i>P</i>     |
|                            | n=39             | n=329           |               | n=23             | n=166           |                   | n=16             | n=161           |              |
|                            | N (%)            | N (%)           |               | N (%)            | N (%)           |                   | N (%)            | N (%)           |              |
| <b>Age, years</b>          |                  |                 |               |                  |                 |                   |                  |                 |              |
| < 60                       | 16 (41.0)        | 140 (42.6)      | 1             | 7 (30.4)         | 84 (50.6)       | <b>0.078</b>      | 9 (56.3)         | 55 (34.2)       | 0.1          |
| ≥ 60                       | 23 (59.0)        | 189 (57.4)      |               | 16 (69.6)        | 82 (49.4)       |                   | 7 (43.8)         | 106 (65.8)      |              |
| <b>Sex</b>                 |                  |                 |               |                  |                 |                   |                  |                 |              |
| Male                       | 23 (59.0)        | 190 (57.8)      | 1             | 14 (60.9)        | 91 (54.8)       | 0.66              | 9 (56.3)         | 98 (60.9)       | 0.79         |
| Female                     | 16 (41.0)        | 139 (42.2)      |               | 9 (39.1)         | 75 (45.2)       |                   | 7 (43.8)         | 63 (39.1)       |              |
| <b>Stage</b>               |                  |                 |               |                  |                 |                   |                  |                 |              |
| I - II                     | 19 (51.4)        | 137 (43.1)      | 0.38          | 14 (60.9)        | 78 (48.8)       | 0.37              | 5 (35.7)         | 58 (37.2)       | 1            |
| III-IV                     | 18 (48.6)        | 181 (56.9)      |               | 9 (39.1)         | 82 (51.2)       |                   | 9 (64.3)         | 98 (62.8)       |              |
| <b>B-symptoms</b>          |                  |                 |               |                  |                 |                   |                  |                 |              |
| No                         | 23 (65.7)        | 201 (64.4)      | 1             | 18 (85.7)        | 106 (68.4)      | 0.13              | 5 (35.7)         | 93 (60)         | 0.094        |
| Yes                        | 12 (34.3)        | 111 (35.6)      |               | 3 (14.3)         | 49 (31.6)       |                   | 9 (64.3)         | 62 (40)         |              |
| <b>LDH</b>                 |                  |                 |               |                  |                 |                   |                  |                 |              |
| Normal                     | 10 (27)          | 127 (42.8)      | <b>0.077</b>  | 8 (36.4)         | 67 (45.3)       | 0.5               | 2 (13.3)         | 59 (40.1)       | <b>0.051</b> |
| Elevated                   | 27 (73)          | 170 (57.2)      |               | 14 (63.6)        | 81 (54.7)       |                   | 13 (86.7)        | 88 (59.9)       |              |
| <b>Extranodal sites</b>    |                  |                 |               |                  |                 |                   |                  |                 |              |
| 0 - 1                      | 28 (73.7)        | 237 (76.2)      | 0.69          | 16 (72.7)        | 123 (79.4)      | 0.58              | 12 (75)          | 112 (72.7)      | 1            |
| ≥ 2                        | 10 (26.3)        | 74 (23.8)       |               | 6 (27.3)         | 32 (20.6)       |                   | 4 (25)           | 42 (27.3)       |              |
| <b>ECOG score</b>          |                  |                 |               |                  |                 |                   |                  |                 |              |
| 0 - 1                      | 30 (83.3)        | 239 (82.1)      | 1             | 19 (90.5)        | 120 (85.1)      | 0.74              | 11 (73.3)        | 117 (79.1)      | 0.74         |
| ≥ 2                        | 6 (16.7)         | 52 (17.9)       |               | 2 (9.5)          | 21 (14.9)       |                   | 4 (26.7)         | 31 (20.9)       |              |
| <b>Tumor size</b>          |                  |                 |               |                  |                 |                   |                  |                 |              |
| < 5 cm                     | 18 (66.7)        | 149 (59.1)      | 0.54          | 10 (66.7)        | 76 (57.6)       | 0.59              | 8 (66.7)         | 72 (60.5)       | 0.77         |
| ≥ 5 cm                     | 9 (33.3)         | 103 (40.9)      |               | 5 (33.3)         | 56 (42.4)       |                   | 4 (33.3)         | 47 (39.5)       |              |
| <b>IPI score</b>           |                  |                 |               |                  |                 |                   |                  |                 |              |
| 0 - 2                      | 20 (54.1)        | 196 (61.8)      | 0.38          | 13 (59.1)        | 107 (67.3)      | 0.47              | 7 (46.7)         | 87 (55.8)       | 0.59         |
| > 2                        | 17 (45.9)        | 121 (38.2)      |               | 9 (40.9)         | 52 (32.7)       |                   | 8 (53.3)         | 69 (44.2)       |              |
| <b>Therapy response</b>    |                  |                 |               |                  |                 |                   |                  |                 |              |
| CR                         | 28 (71.8)        | 243 (73.9)      | 0.85          | 17 (73.9)        | 122 (73.5)      | 1                 | 11 (68.8)        | 119 (73.9)      | 0.77         |
| Non-CR                     | 11 (28.2)        | 86 (26.1)       |               | 6 (26.1)         | 44 (6.6)        |                   | 5 (31.2)         | 42 (26.1)       |              |
| <b>GCB/ABC subtype</b>     |                  |                 |               |                  |                 |                   |                  |                 |              |
| GCB                        | 23 (59)          | 166 (50.8)      | 0.33          |                  |                 |                   |                  |                 |              |
| ABC                        | 16 (41)          | 161 (49.2)      |               |                  |                 |                   |                  |                 |              |
| <b>TP53 mutations</b>      |                  |                 |               |                  |                 |                   |                  |                 |              |
| No                         | 24 (61.5)        | 251 (80.2)      | <b>0.0079</b> | 12 (52.2)        | 124 (77)        | <b>0.011</b>      | 12 (75)          | 126 (83.4)      | 0.4          |
| Yes                        | 15 (38.5)        | 62 (19.8)       |               | 11 (47.8)        | 37 (23)         |                   | 4 (25)           | 25 (16.6)       |              |
| <b>MYC mutations</b>       |                  |                 |               |                  |                 |                   |                  |                 |              |
| No                         | 19 (48.7)        | 240 (72.9)      | <b>0.0017</b> | 7 (30.4)         | 121 (72.5)      | <b>&lt;0.0001</b> | 12 (75)          | 118 (73.3)      | 0.88         |
| Yes                        | 20 (51.3)        | 89 (27.1)       |               | 16 (69.6)        | 46 (27.5)       |                   | 4 (25)           | 43 (26.7)       |              |
| <b>MYC CDS mutations</b>   |                  |                 |               |                  |                 |                   |                  |                 |              |
| No                         | 26 (66.7)        | 291 (88.4)      | <b>0.0002</b> | 11 (47.8)        | 149 (89.2)      | <b>&lt;0.0001</b> | 15 (93.8)        | 141 (87.6)      | 0.47         |
| Yes                        | 13 (33.3)        | 38 (11.6)       |               | 12 (52.2)        | 18 (10.8)       |                   | 1 (6.2)          | 20 (12.4)       |              |
| <b>PRDM1 CDS mutations</b> |                  |                 |               |                  |                 |                   |                  |                 |              |
| No                         | 20 (51.3)        | 252 (77.1)      | <b>0.0005</b> | 12 (52.2)        | 129 (77.7)      | <b>0.0084</b>     | 8 (50)           | 121 (76.1)      | <b>0.024</b> |
| Yes                        | 19 (48.7)        | 75 (22.9)       |               | 11 (47.8)        | 37 (22.3)       |                   | 8 (50)           | 38 (23.9)       |              |
| <b>IgG IHC</b>             |                  |                 |               |                  |                 |                   |                  |                 |              |
| 0%                         | 38 (97.4)        | 288 (87.5)      | <b>0.066</b>  | 23 (100)         | 151 (90.4)      | 0.12              | 15 (93.8)        | 136 (84.5)      | 0.32         |
| 100%                       | 1 (2.6)          | 41 (12.5)       |               | 0 (0)            | 16 (9.6)        |                   | 1 (6.2)          | 25 (15.5)       |              |

**Abbreviations:** LDH, lactate dehydrogenase; ECOG, Eastern Cooperative Oncology Group; IPI, International Prognostic Index; CR, complete remission; PR, partial response; SD, stable disease; PD, progressive disease; GCB, germinal center B-cell-like; ABC, activated B-cell-like; MUT, mutated; WT, wild-type.

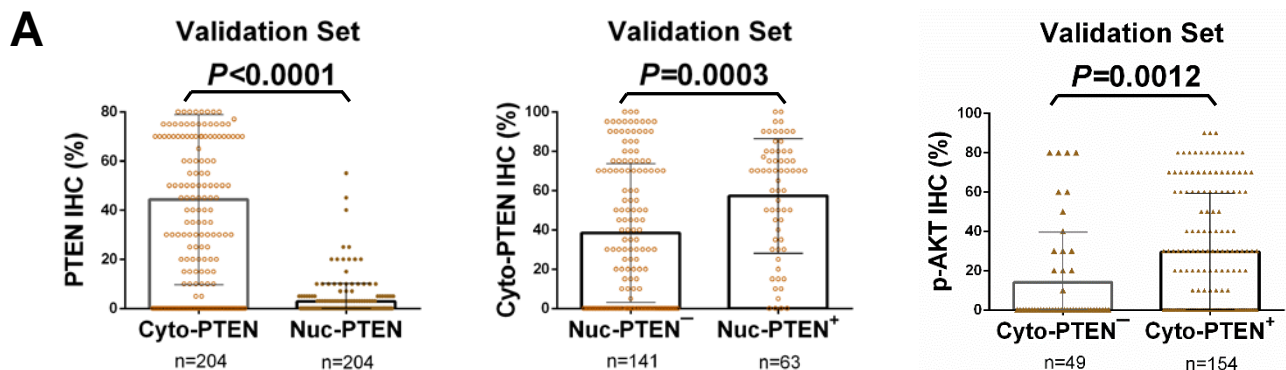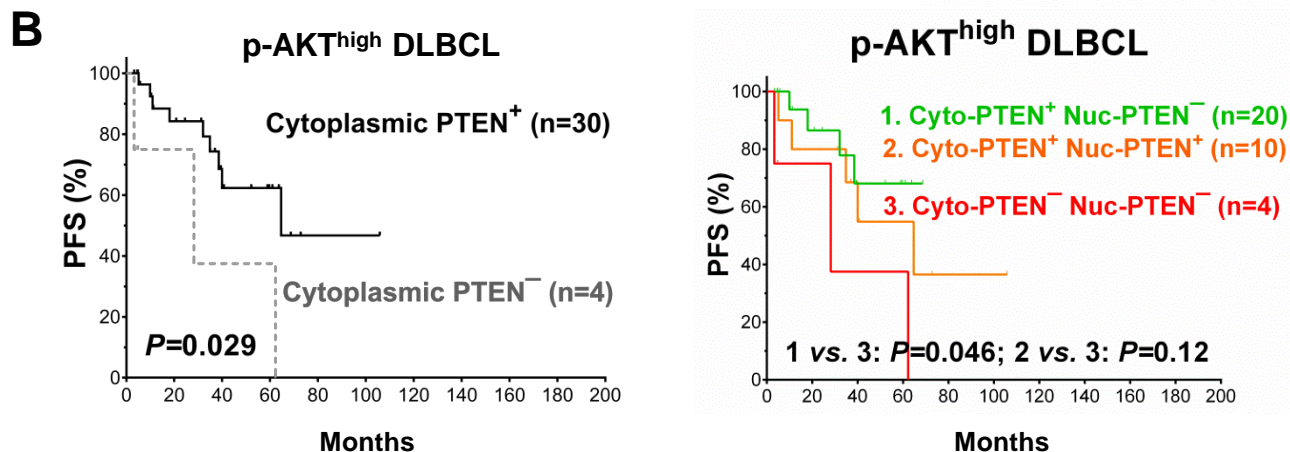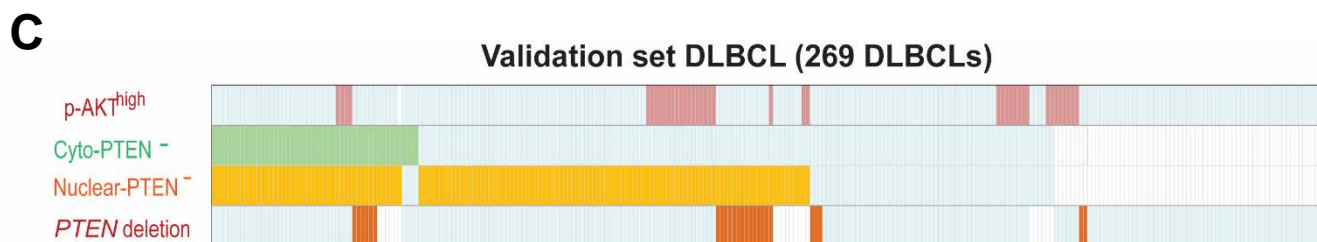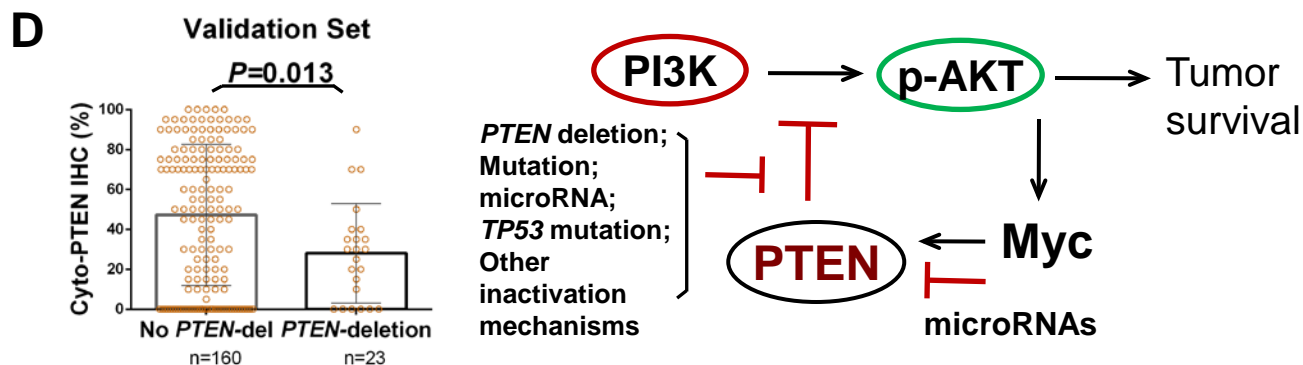

A

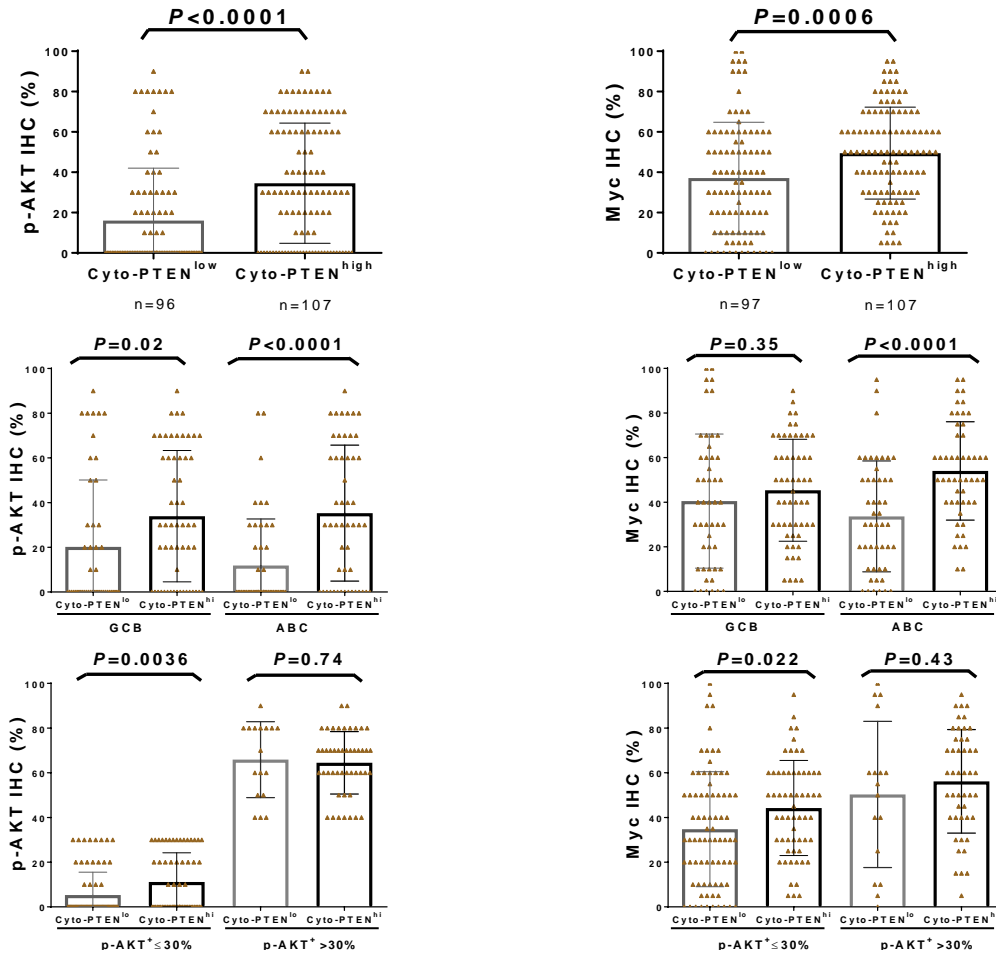

B

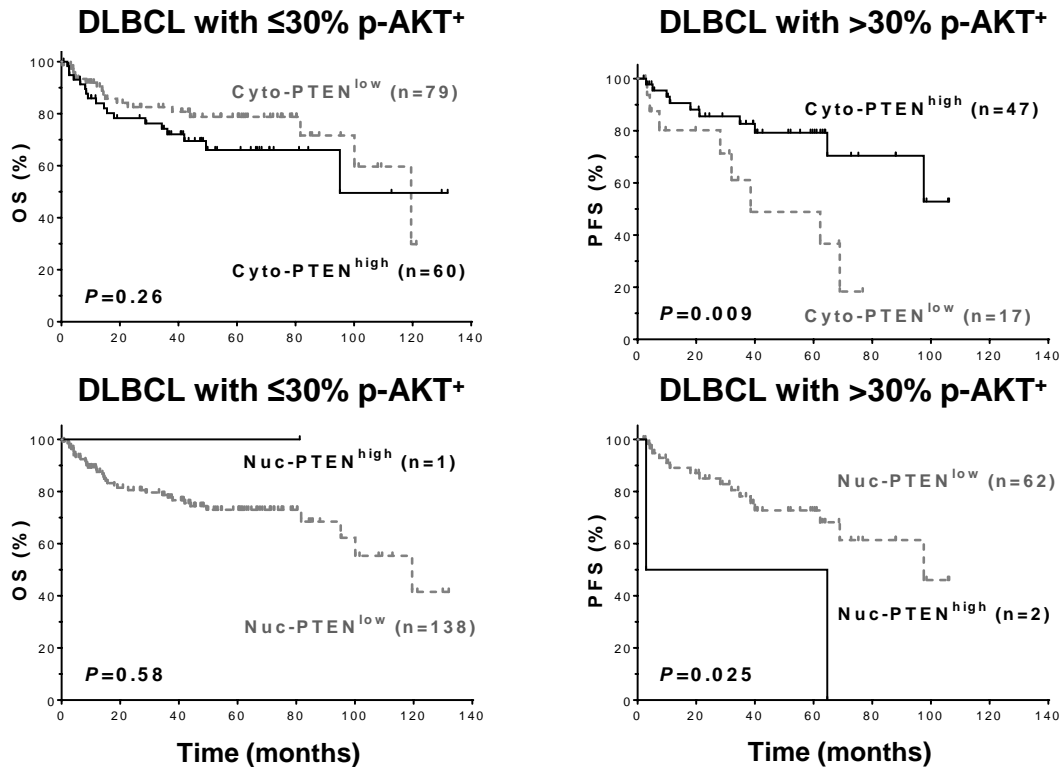

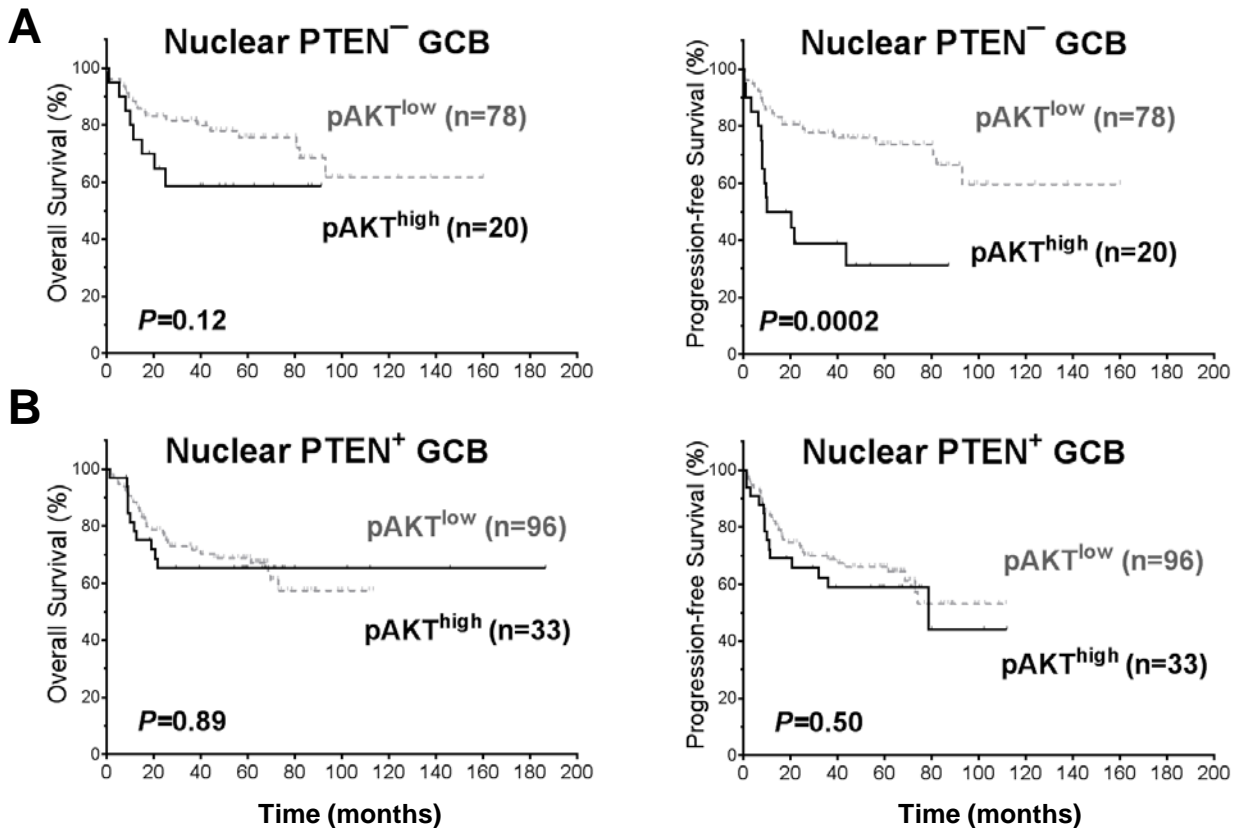

### Figure Legends:

**Supplementary Figure S1.** PTEN/*PTEN* analysis in an independent validation cohort of patients with diffuse large B-cell lymphoma (DLBCL). **(A)** PTEN was found to be expressed mainly in the cytoplasm. Nuclear PTEN expression was positively correlated with cytoplasmic PTEN expression. Cytoplasmic PTEN expression positively correlated with p-AKT expression. **(B)** In DLBCL patients with AKT hyperactivation (high phospho-AKT expression, p-AKT<sup>high</sup>), loss of cytoplasmic PTEN expression was associated with significantly shorter progression-free survival (PFS). **(C)** Distribution of *PTEN* deletion, PTEN protein loss, and p-AKT overexpression as indicated colors in the validation cohort (each column represented one patient). Cases without these abnormalities are shown in light blue or white (for negative or unknown status, respectively). **(D)** *PTEN* deletion correlated with decreased PTEN expression in the cytoplasm by unpaired *t* test. A schematic model summarizes the possible mechanisms of PTEN loss as suggested by this study.

**Supplementary Figure S2.** Correlative and prognostic analysis for high PTEN expression in the validation cohort. **(A)** High PTEN cytoplasmic expression was associated with higher mean levels of p-AKT and Myc expression. **(B)** Only in p-AKT<sup>+</sup> cases, high PTEN cytoplasmic expression was associated with better PFS; in contrast, high PTEN nuclear expression was associated with poorer PFS.

**Supplementary Figure S3.** In germinal center B-cell-like (GCB) DLBCL cases of the training cohort, high phosphorylated-AKT expression (pAKT<sup>high</sup>, cutoff:  $\geq 70\%$ ) had significant adverse prognostic effects only in cases without nuclear PTEN expression (PTEN<sup>-</sup>, Figure A) but not in cases with nuclear PTEN expression (PTEN<sup>+</sup>, Figure B).
